# Supplementary material for: Plasma Pharmacokinetic Determination of Canagliflozin and Its Metabolites in a Type 2 Diabetic Rat Model by UPLC-MS/MS
Source: MDPI journal article supplement (doi:10.3390/molecules23051229), 2018-05-20
Supplement: s1 [file s1]

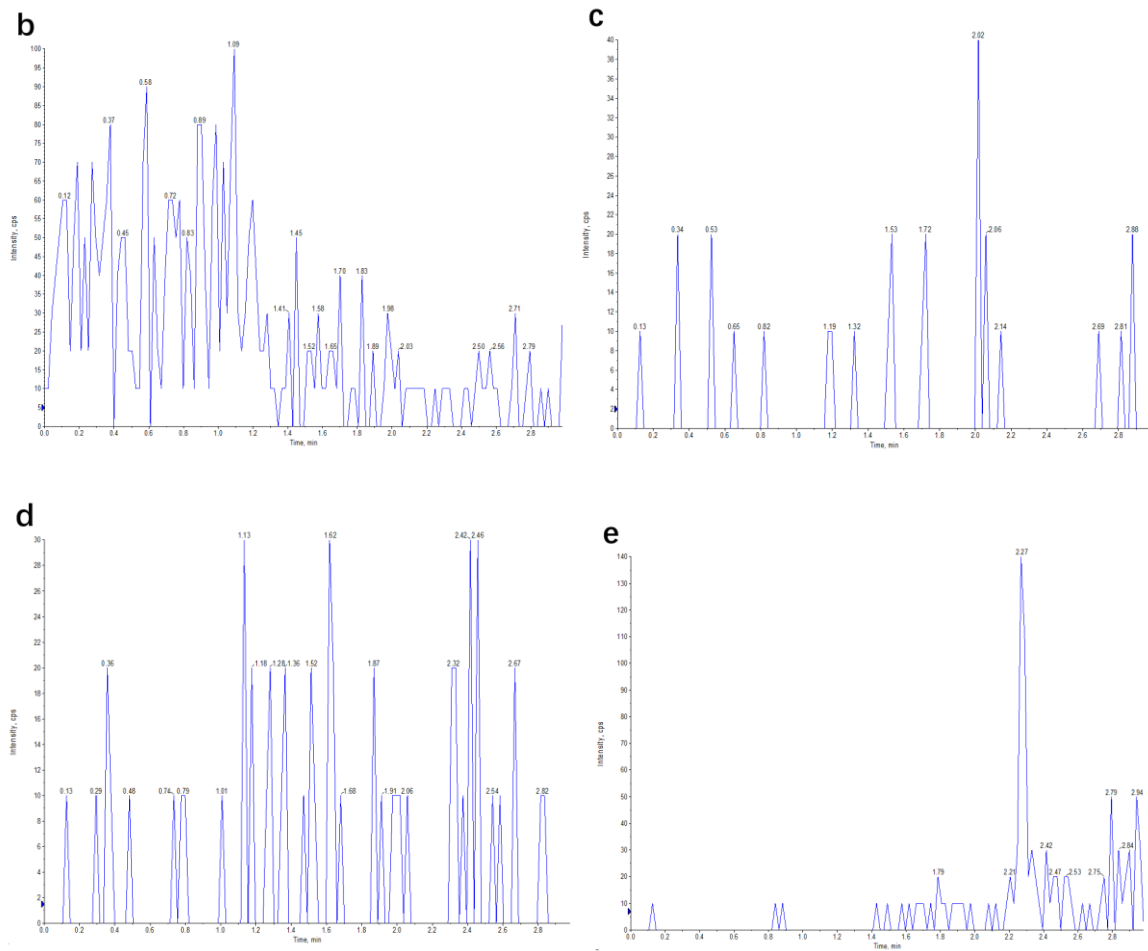

**Figure S1.** Figure b, c, d and e are the blank plasma figures of Figure B, C D and E under the corresponding conditions.
